# Supplementary material for: Cooperation between Rb and Arf in suppressing mouse retinoblastoma
Source: JCI journal article supplement (doi:10.1172/jci61403), 2012-04-09
Supplement: sd1 [file 1]

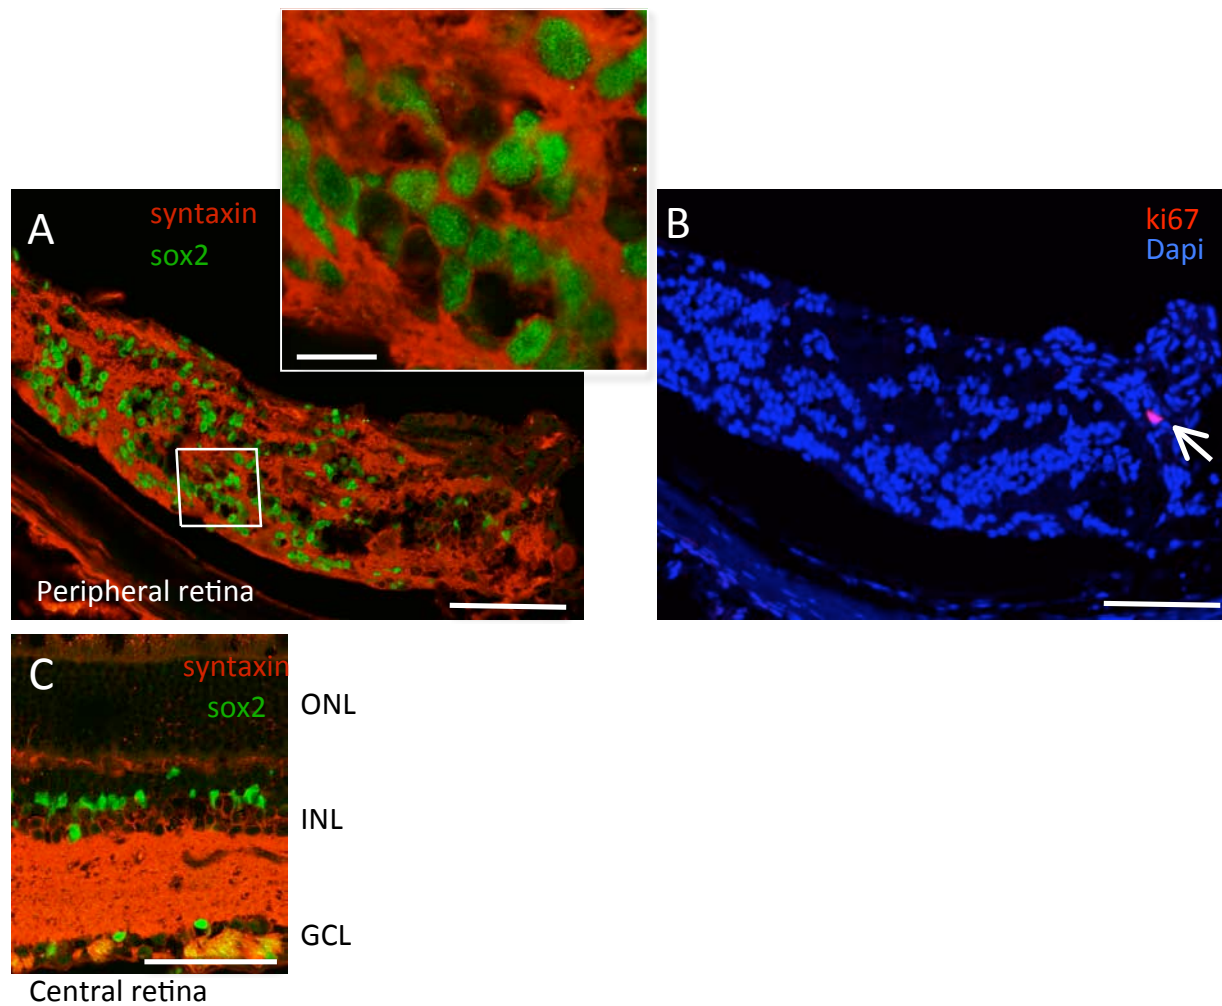

**Supplemental Figure 1 . Retinoma-like lesions in *Rb/p107DKO* retina**

**A)**sox2/syntaxin staining of disorganized retinoma-like lesion in *Rb/p107DKO* retina at 1 year staining positively for murine retinoblastoma markers. **B)**ki67 (red) with DAPI staining (blue) of adjacent section from the same lesion. Scale bar represents 75uM for low power images, 10uM for magnified image. **C)**Sox2/syntaxin staining of normal area (central region) of the same retina showing normal pattern of sox2/syntaxin expression.

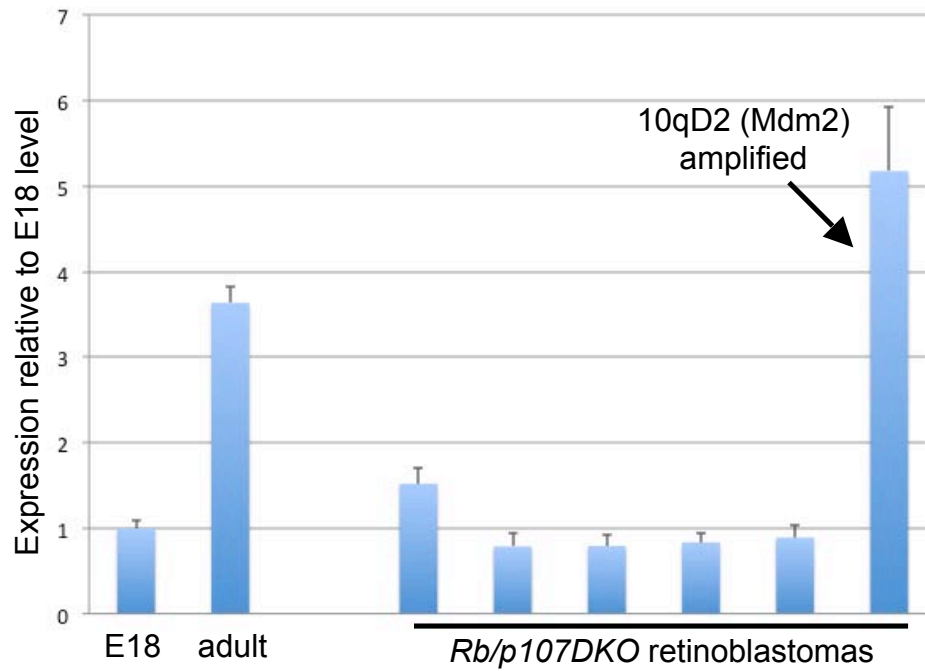

**Supplemental Figure 2. Increased Mdm2 expression upon genomic amplification in murine retinoblastomas.** Real-time PCR showing expression of Mdm2 in normal retina (E18 and adult) or *Rb/p107DKO* retinoblastomas. The tumor with genomic amplification (arrow) exhibited increased Mdm2 expression compared to non-amplified samples. Data were normalized to actin.

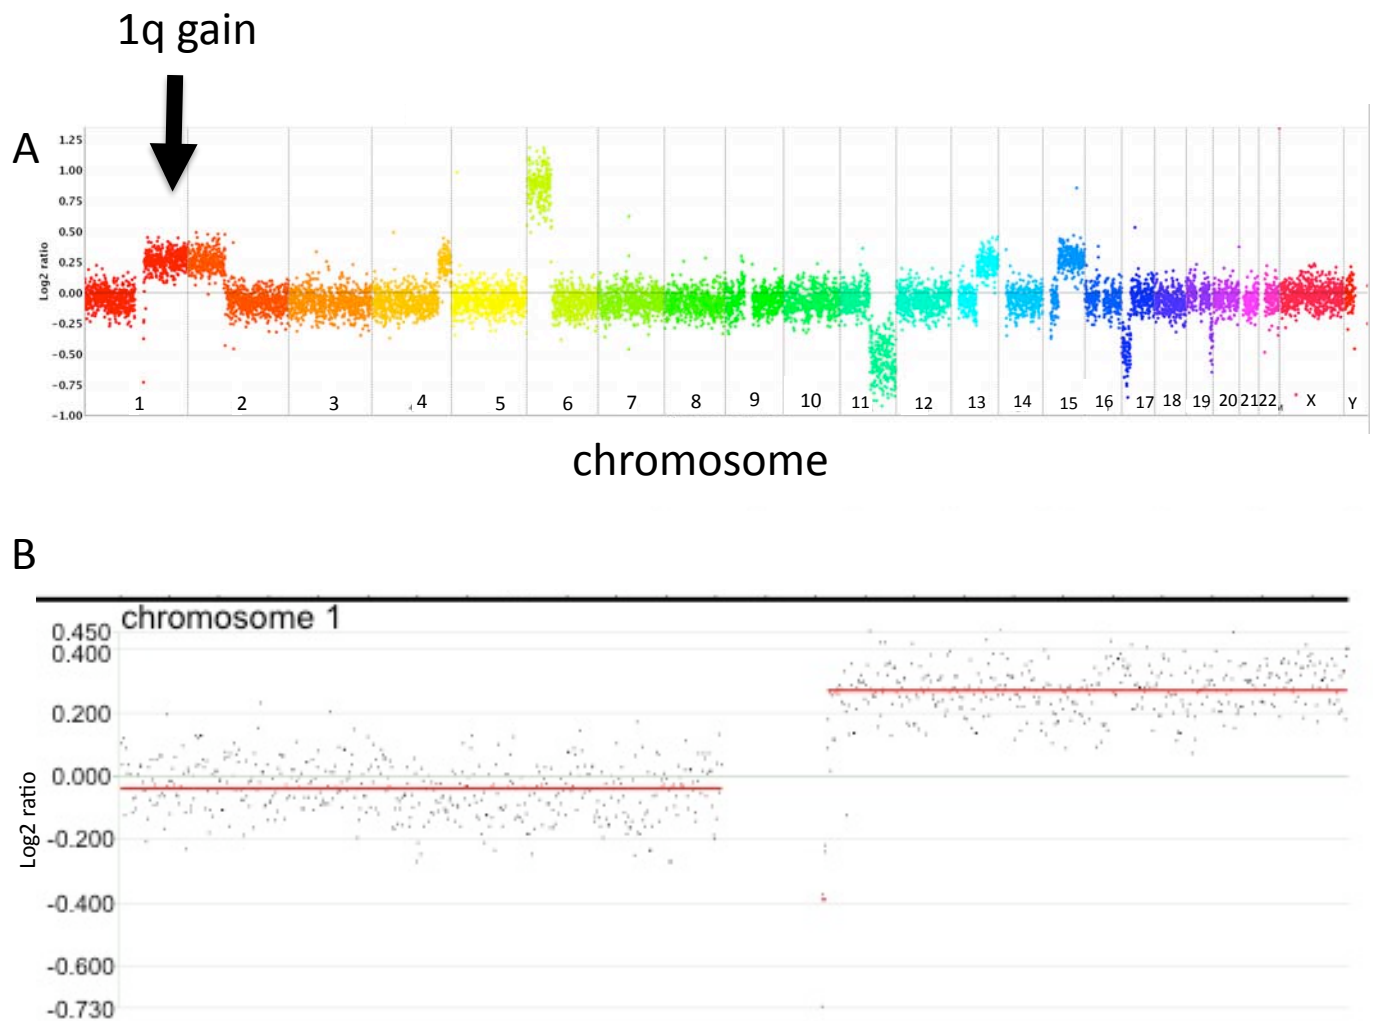

**Supplemental Figure 3. 1q gain in human retinoblastoma. A)** Array CGH data showing whole genome profile for human retinoblastoma sample with 1q gain. **B)** Chromosome 1 plot showing 1q gain.

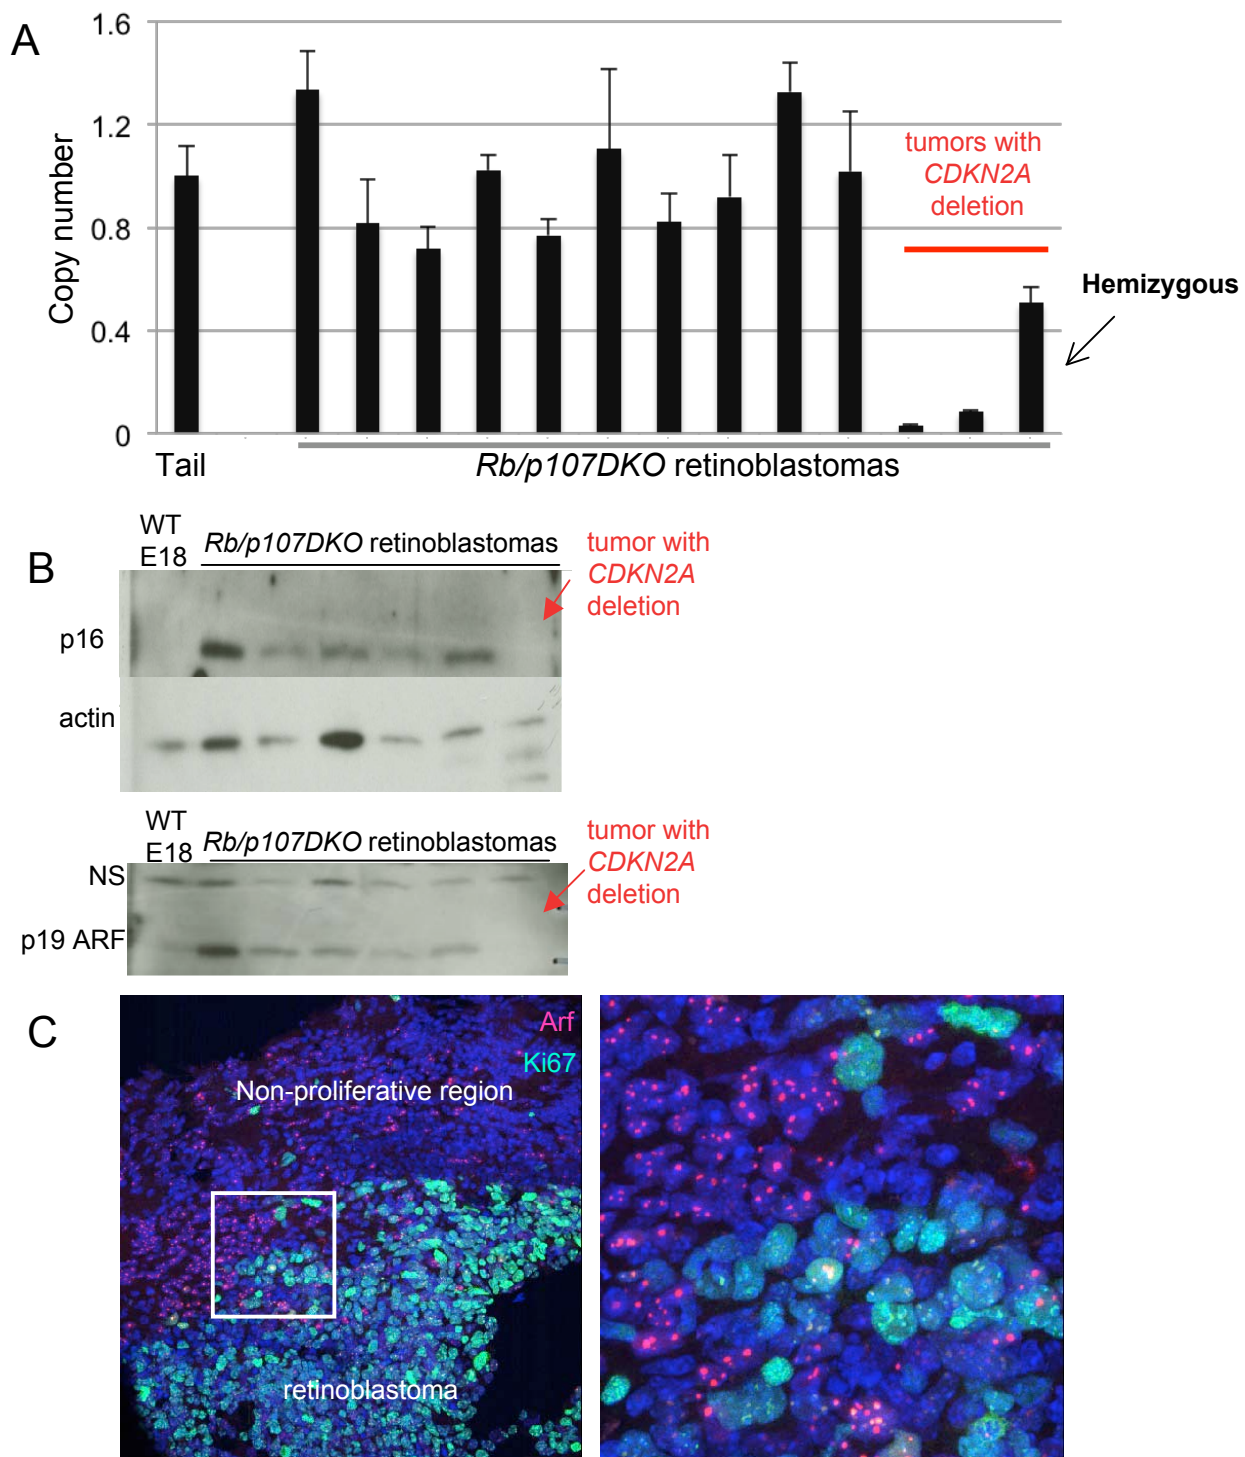

**Supplemental Figure 4: Arf and p16 expression in retinoblastoma** **A)** Real-time PCR showing *Cdkn2a* copy number in *Rb/p107DKO* retinoblastomas and control tail DNA. Data are normalized to control gene *Ant1*. Three tumors with *Cdkn2a* deletion are indicated (one tumor exhibits hemizygous deletion). **B)** Western blot analyses showing Arf and p16 expression in *Rb/p107DKO* tumors. NS refers to non-specific band. Sample from last lane is from a murine retinoblastoma with *Cdkn2a* deletion. **C)** Immunohistochemistry showing Arf immunostaining in an *Rb/p107DKO* retinoblastoma. Note that nucleolar Arf expression is predominantly in non-proliferating ki67 negative cells.

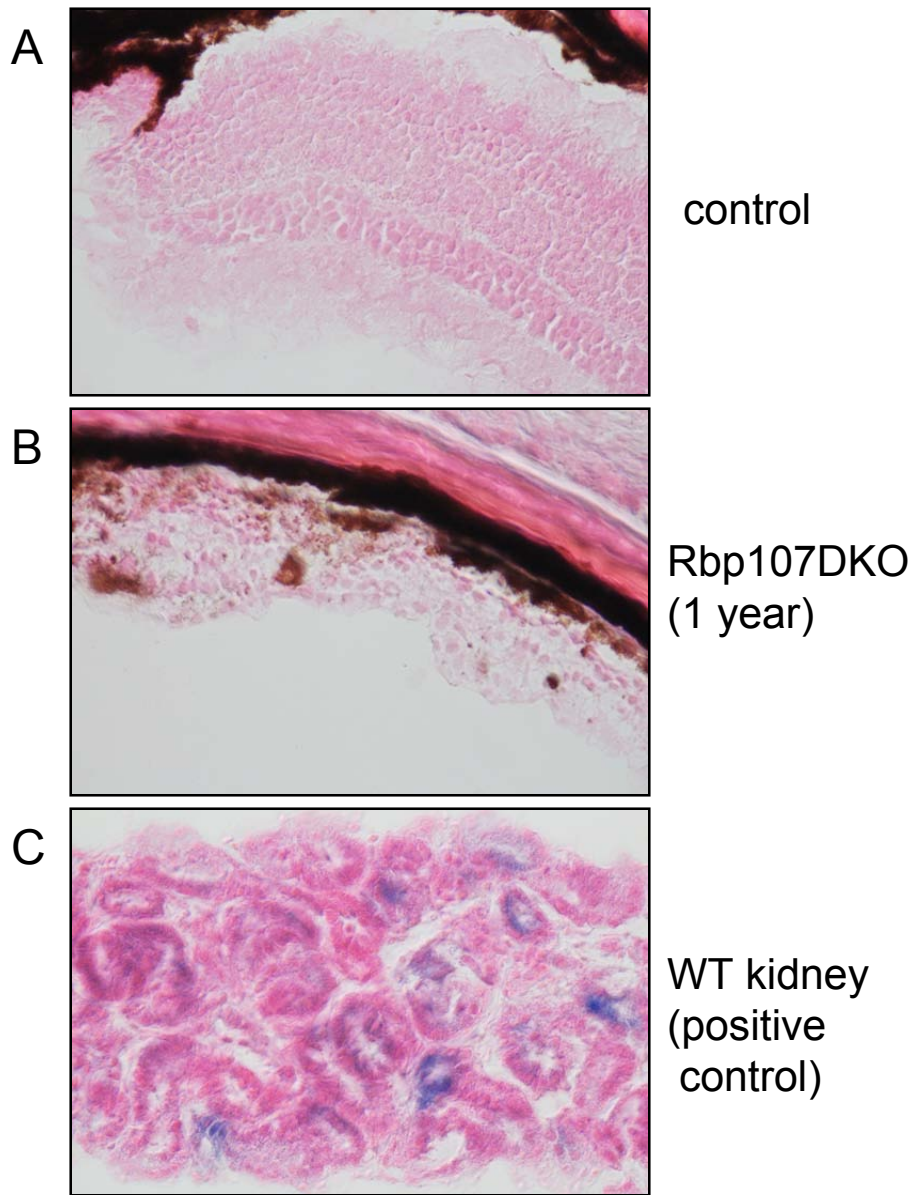

**Supplemental Figure 5. Lack of senescence associated Beta Gal staining in *Rb/p107DKO* retina at 1 year of age.** Control retina and *Rb/p107DKO* retinas were stained for SA-Beta Gal. No positive cells were detected in the *Rb/p107DKO* lesions. Also shown is kidney from a 1-year old wild-type mouse where senescent SA-beta Gal positive cells (blue stain) are present.



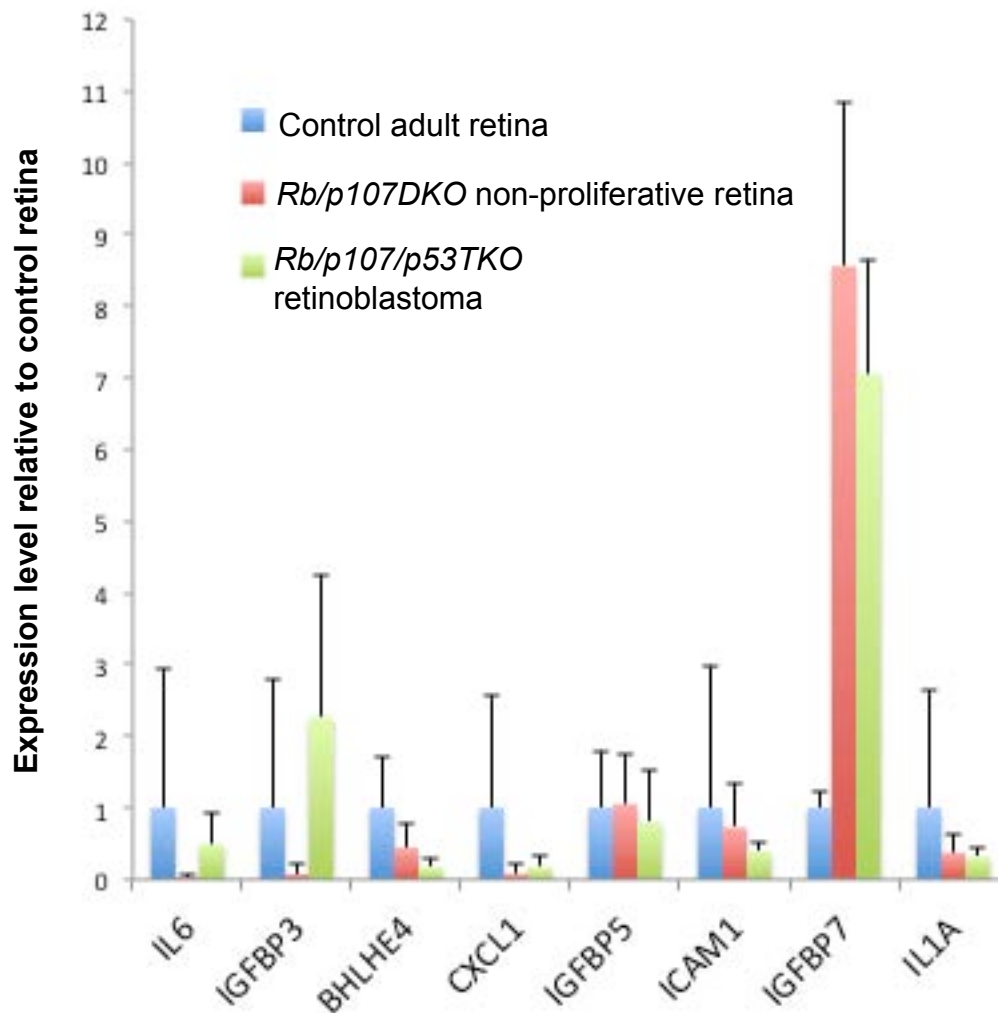

**Supplemental Figure 6. Expression of senescence associated secretome factors in non-proliferative lesions from *Rb/p107DKO* retina.**

Real time PCR showing expression of transcripts of the senescence associated secretome in control retina vs non-proliferative *Rb/p107DKO* retina. Also shown is expression level in retinoblastomas that arose in *Rb/p107/p53TKOs*. Of the senescence associated transcripts, only *Igfbp7* is upregulated in *Rb/p107DKO* lesions and there is no suppression of *Igfbp7* upregulation in tumors that have inactivated p53. N=5 independent retinas per group, error bars represent standard deviation.

Supplemental Table 1

| <b>Primers</b> | forward                          | reverse                          |
|----------------|----------------------------------|----------------------------------|
| IL6            | 5' CCG GAG AGG AGA CTT CAC AG 3' | 5' TCC ACG ATT TCC CAG AGA AC 3' |
| Igfbp3         | 5' CAG GCA GCC TAA GCA CCT AC 3' | 5' CTT TCC ACA CTC CCA GCA TT 3' |
| Bhlhe4         | 5' CAA CTG AAG CGA CAC CTC AA 3' | 5' ATC CGA GGG TCT CAA GAG GT 3' |
| Cxcl1          | 5' TGT TGT GCG AAA AGA AGT GC 3' | 5' TAC AAA CAC AGC CTC CCA CA 3' |
| Igfbp5         | 5' GAC CCC GGA AAT GTA TTC CT 3' | 5' CCA ACG CTT TGC TTT CTT TC 3' |
| Icam1          | 5' CTT CCA GCT ACC ATC CCA AA 3' | 5' CTT CAG AGG CAG GAA ACA GG 3' |
| Igfbp7         | 5' GGA AAA TCT GGC CAT TCA GA 3' | 5' TGC GTG GCA CTC ATA CTC TC 3' |
| Il1a           | 5' AGC AGC CTT ATT TCG GGA GT 3' | 5' GTG CAA GTG ACT CAG GGT GA 3' |
| Actin          | 5' TCC GTA AAG ACC TCT ATG CC 3' | 5' ATC TTC ATG GTG CTA GGA GC 3' |
